# Supplementary material for: Photoelectric properties and potential nitro derivatives sensing by a highly luminescent of Zn(ii) and Cd(ii) metal–organic frameworks assembled by the flexible hexapodal ligand, 1,3,5-triazine-2,4,6-triamine hexaacetic acid
Source: Royal Society of Chemistry journal article supplement (doi:10.1039/c6ra01933a), 2016-01-01
Supplement: c6ra01933a1.pdf [file c6ra01933a1.pdf]

## Supporting Information for

# **Photoelectric properties and potential nitro derivatives sensing by a highly luminescent of Zn (II) and Cd (II) metal-organic frameworks assembled by the flexible hexapodal ligand,1,3,5-triazine-2,4,6-triamine hexaacetic acid**

Shuang Li,<sup>a</sup> Jian Song,<sup>a</sup> Jue Chen Ni,<sup>a</sup> Zhi Nan Wang,<sup>a</sup> Xue Gao,<sup>a</sup> Zhan Shi,<sup>b</sup> Feng Ying Bai,<sup>a</sup> Yong Heng Xing<sup>\*a</sup>

<sup>a</sup> College of Chemistry and Chemical Engineering, Liaoning Normal University, Dalian City, 116029, China. E-mail: xingyongheng2000@163.com

<sup>b</sup> State Key Laboratory of Inorganic Synthesis and Preparative Chemistry, College of Chemistry, Jilin University, Changchun 130012, P.R. China

## Supplementary Index

|                                     |     |
|-------------------------------------|-----|
| <b>1. Infrared Spectra</b>          | pS2 |
| <b>2. TG analyses</b>               | pS2 |
| <b>3. PXRD</b>                      | pS3 |
| <b>4. UV-vis Spectra</b>            | pS3 |
| <b>5. Band gap</b>                  | pS4 |
| <b>6. Fluorescence Spectroscopy</b> | pS5 |
| <b>7. Table for bond angles</b>     | pS8 |

## 1. Infrared spectra

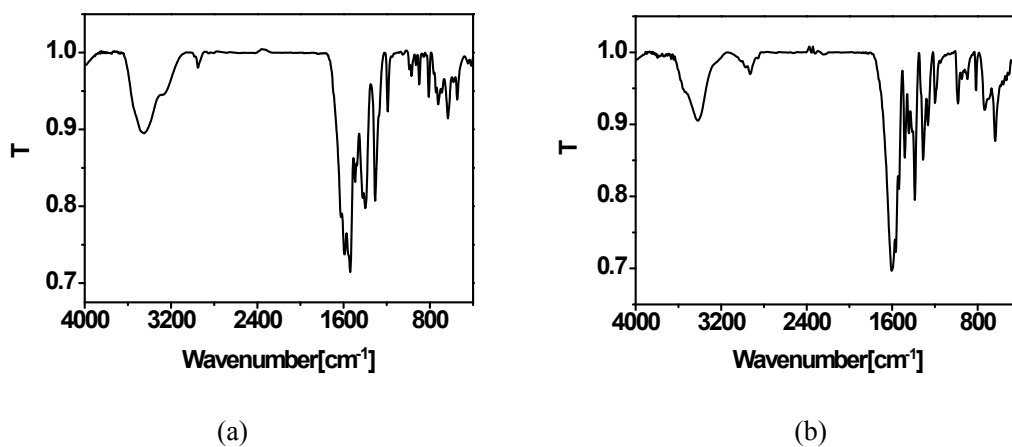

Figure S1. IR spectra of coordination polymers: (a) for 1, (b) for 2

## 2. TG analyses

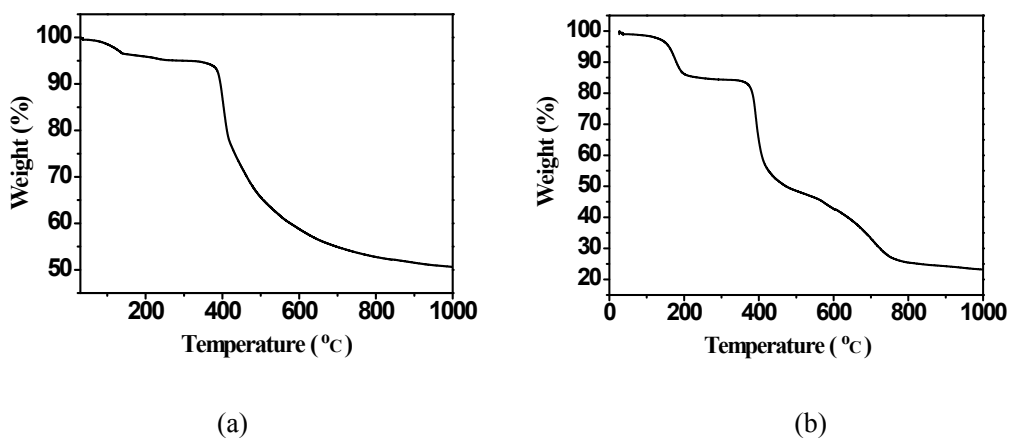

Figure S2. TG curves of coordination polymers: (a) for 1, (b) for 2

### 3. PXRD

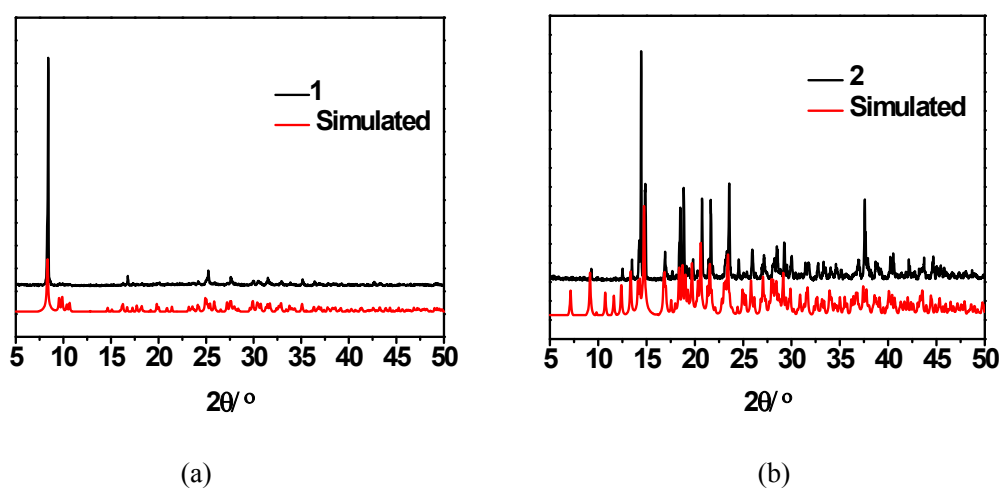

Figure S3. Powder X-ray diffraction patterns for coordination polymers: (a) for 1, (b) for 2.

### 4. UV-vis Spectroscopy

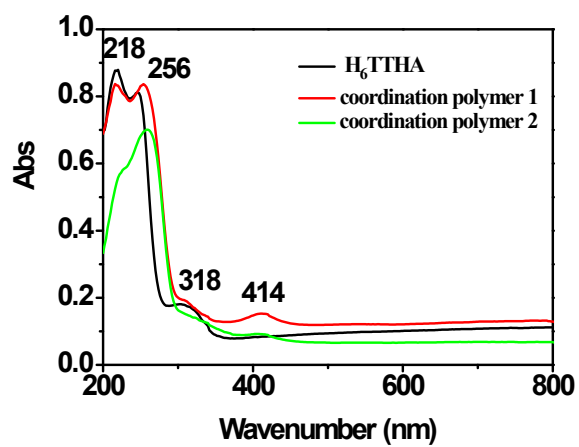

Figure S4. Solid-state UV-vis absorption spectra of the ligand  $H_6TTHA$  and coordination polymers 1 and 2.

## 5. Band gap

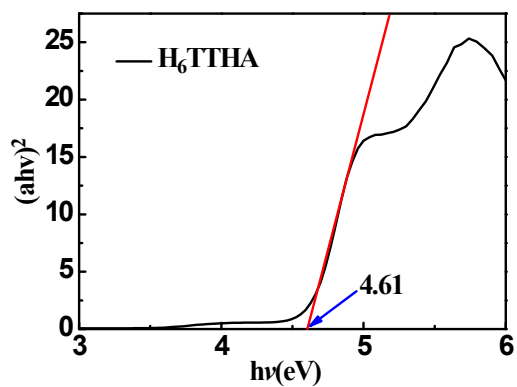

(a)

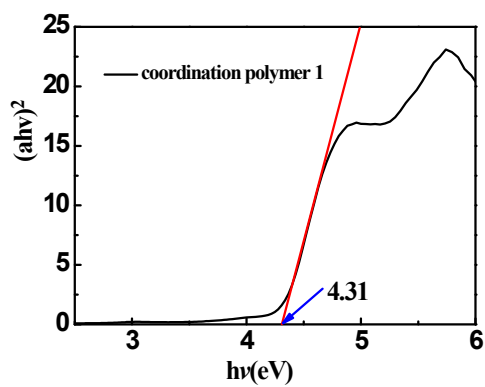

(b)

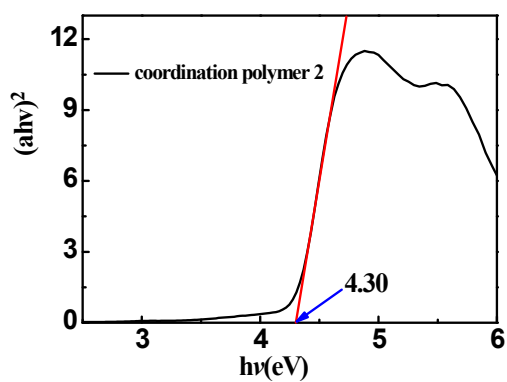

(c)

**Figure S5.** The band gap of the H<sub>6</sub>TTHA ligand and the two coordination polymers:(a) for the H<sub>6</sub>TTHA ligand, (b) for 1, (c) for 2.

## 6. Fluorescence Spectroscopy

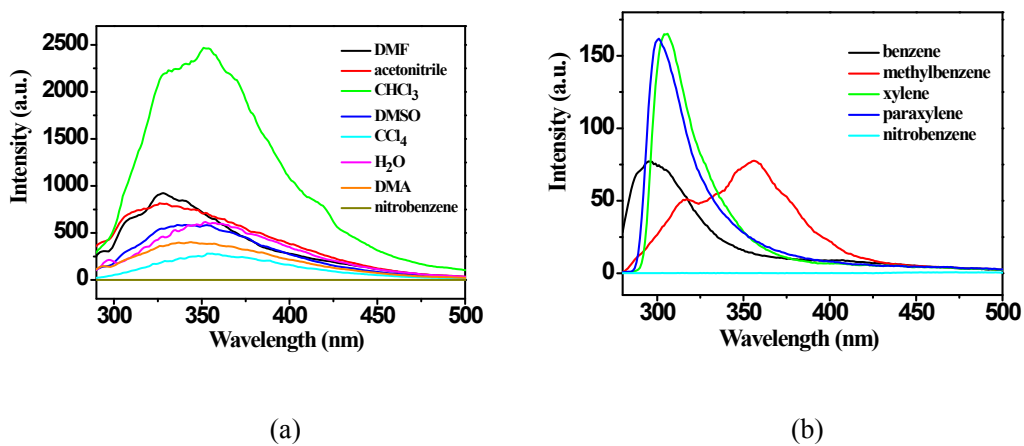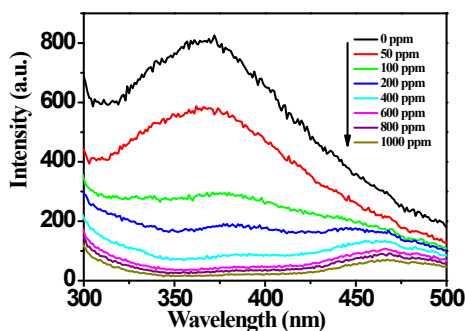

**Figure S6.** (a) Emission spectra of coordination polymer **1** in different solvents. (b) Emission spectra of **1** in benzene, methylbenzene, xylene, and paraxylene. (c) Luminescence quenching of **1** dispersed in H<sub>2</sub>O by gradually increasing TNP concentration.

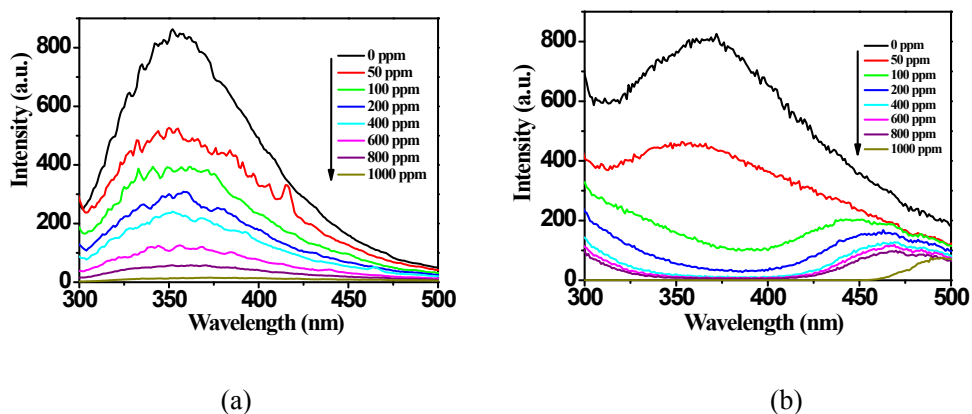

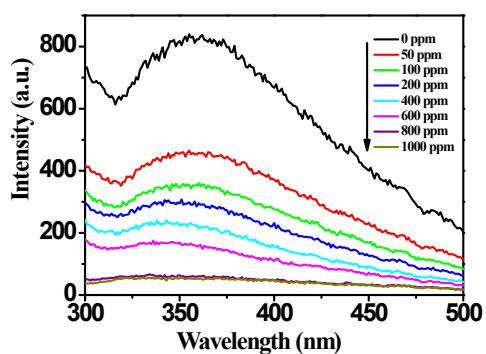

(c)

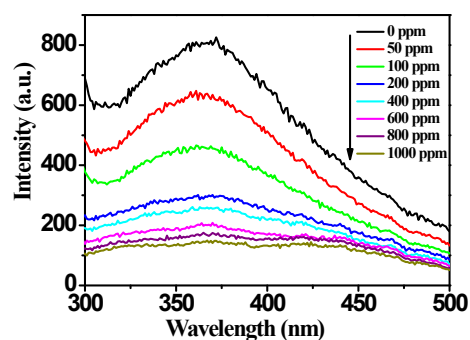

(d)

**Figure S7.** Luminescence quenching of coordination polymer **1** dispersed in H<sub>2</sub>O by gradually increasing different quenchers' concentration: (a) NB, (b) p-Nitroaniline, (c) m-Dinitrobenzene, (d) sodium nitrobenzene sulfonate.

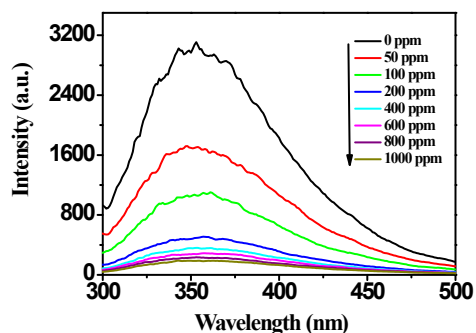

(a)

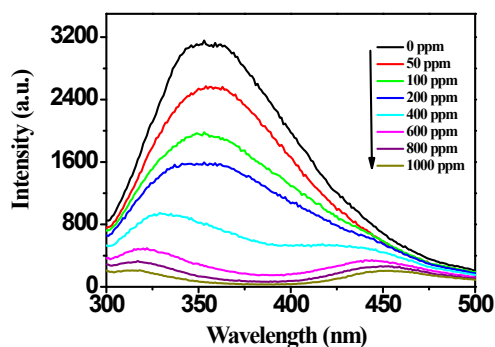

(b)

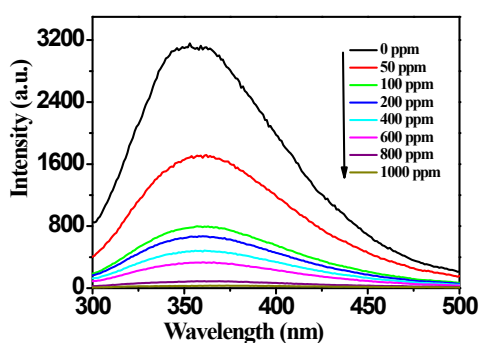

(c)

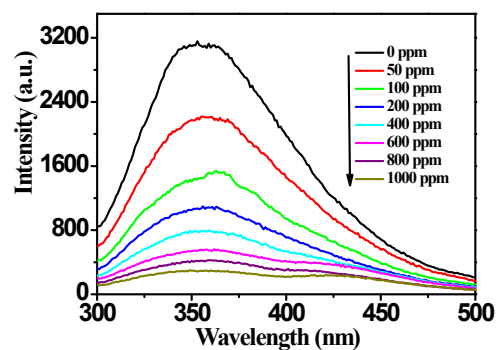

(d)

**Figure S8.** Luminescence quenching of coordination polymer **2** dispersed in H<sub>2</sub>O by gradually increasing different quenchers' concentration: (a) NB, (b) p-Nitroaniline, (c) m-Dinitrobenzene, (d) sodium nitrobenzene sulfonate.

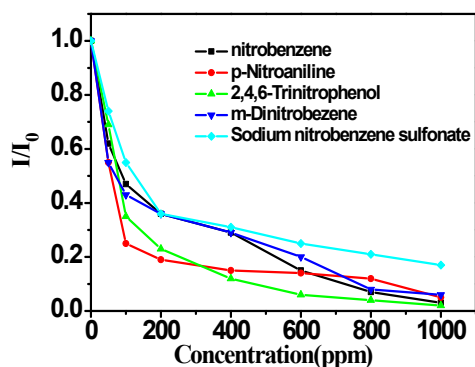

**Figure S9.** Plot of fraction of luminescence intensity of **1** vs. concentration of analytes.  $I_0$  and  $I$  are the luminescence intensities in the absence and presence of analyte, respectively.

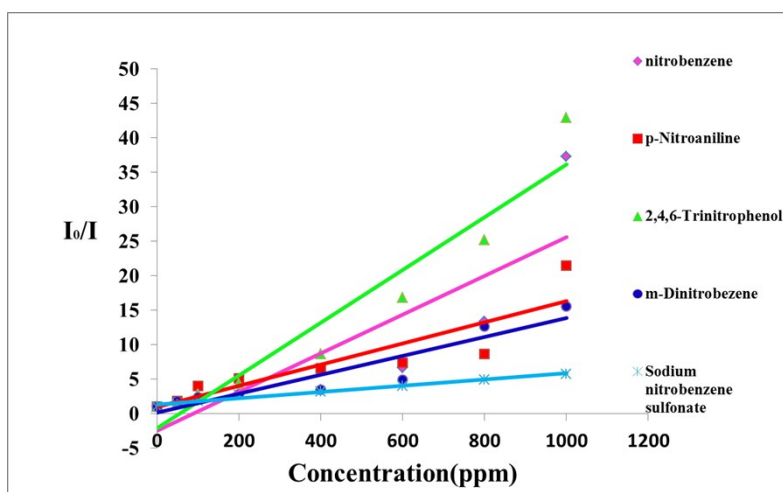

(a)

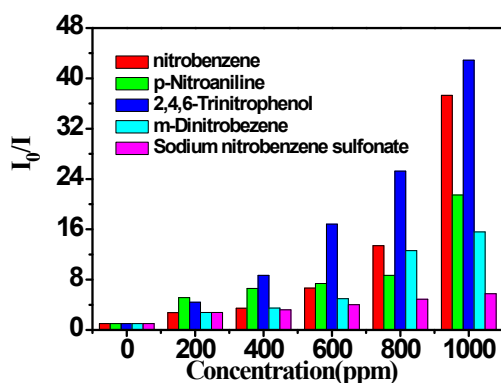

(b)

**Figure S10.** For **1**, (a) linear relationships of the quenching are fluorescence intensity ratio and quencher concentration; (b) at different concentrations, the value of the fluorescence intensities and the quencher ratios.



## 7. Table for bond angles

**Table S1.** Bond angles (deg) for coordination polymers **1** and **2**\*

| <b>Coordination polymer 1</b>          |            |                                        |            |                                       |            |
|----------------------------------------|------------|----------------------------------------|------------|---------------------------------------|------------|
| O12 <sup>C</sup> -Cd1-O1               | 92.9(2)    | O1-Cd1-O1 <sup>A</sup>                 | 84.25(17)  | O12 <sup>C</sup> -Cd1-O8              | 91.4(2)    |
| O1-Cd1-O8                              | 171.6(2)   | O1 <sup>A</sup> -Cd1-O8                | 99.7(2)    | O12 <sup>C</sup> -Cd1-O2              | 83.1(2)    |
| O1-Cd1-O2                              | 84.71(2)   | O1 <sup>A</sup> -Cd1-O2                | 153.16(18) | O8-Cd1-O2                             | 88.6(2)    |
| O12 <sup>C</sup> -Cd1-O13 <sup>B</sup> | 154.4(2)   | O1-Cd1-O13 <sup>B</sup>                | 90.42(19)  | O1 <sup>A</sup> Cd1-O13 <sup>B</sup>  | 83.78(18)  |
| O8-Cd1-O13 <sup>B</sup>                | 82.6(2)    | O2-Cd1-O13 <sup>B</sup>                | 71.91(18)  | O5-Cd2-O4                             | 154.82(19) |
| O5-Cd2-O3                              | 94.2(2)    | O4-Cd2-O3                              | 94.5(2)    | O5-Cd2-O10 <sup>D</sup>               | 107.9(2)   |
| O4-Cd2-O10 <sup>D</sup>                | 96.7(2)    | O3-Cd2-O10 <sup>D</sup>                | 81.1(2)    | O5-Cd2-O6 <sup>D</sup>                | 85.0(2)    |
| O4-Cd2-O6 <sup>D</sup>                 | 106.0(2)   | O3-Cd2-O6 <sup>D</sup>                 | 132.29(19) | O10 <sup>D</sup> -Cd2-O6 <sup>D</sup> | 54.5(2)    |
| O5-Cd2-O6                              | 89.50(19)  | O4-Cd2-O6                              | 74.1(2)    | O3-Cd2-O6                             | 158.34(19) |
| O10 <sup>D</sup> -Cd2-O6               | 118.0(2)   | O6 <sup>P</sup> -Cd2-O6                | 69.3(2)    | O13 <sup>B</sup> -Cd3-O7 <sup>B</sup> | 129.2(2)   |
| O7 <sup>B</sup> -Cd3-O5 <sup>B</sup>   | 117.1(2)   | O13 <sup>B</sup> -Cd3-O2               | 77.6(2)    | O7-Cd3-O2                             | 124.71(19) |
| O5-Cd3-O2 <sup>B</sup>                 | 106.6(2)   | O13-Cd3-O7 <sup>B</sup>                | 152.4(2)   | O7-Cd3-O7 <sup>B</sup>                | 77.1(2)    |
| O5-Cd3-O <sup>B</sup>                  | 79.19(18)  | O2 <sup>B</sup> -Cd3-O7 <sup>B</sup>   | 79.67(19)  | O1 <sup>B</sup> -Cd4-O5               | 107.92(2)  |
| O1 <sup>B</sup> -Cd4-O15 <sup>B</sup>  | 118.2(2)   | O5-Cd4-O15 <sup>B</sup>                | 91.2(2)    | O1 <sup>B</sup> -Cd4-O9 <sup>D</sup>  | 92.9(2)    |
| O5-Cd4-O9 <sup>D</sup>                 | 158.8(2)   | O15 <sup>B</sup> -Cd4-O9 <sup>D</sup>  | 82.3(2)    | O1 <sup>B</sup> -Cd4-O4 <sup>D</sup>  | 96.74(2)   |
| O5-Cd4-O4 <sup>D</sup>                 | 117.30(19) | O15 <sup>B</sup> -Cd4-O4 <sup>D</sup>  | 125.8(2)   | O9 <sup>D</sup> -Cd4-O4 <sup>B</sup>  | 54.11(19)  |
| <b>Coordination polymer 2</b>          |            |                                        |            |                                       |            |
| O6 <sup>A</sup> -Zn1-O7 <sup>A</sup>   | 122.64(13) | O6 <sup>A</sup> -Zn1-O1                | 98.53(13)  | O7 <sup>A</sup> -Zn1-O1               | 121.58(14) |
| O6 <sup>A</sup> -Zn1-O3 <sup>B</sup>   | 121.50(12) | O7 <sup>A</sup> -Zn1-O3 <sup>B</sup>   | 90.17(13)  | O1-Zn1-O3 <sup>B</sup>                | 102.31(12) |
| O11-Zn2-O9                             | 150.94(12) | O11-Zn2-O15                            | 97.86(12)  | O9-Zn2-O15                            | 111.17(13) |
| O11-Zn2-O4 <sup>D</sup>                | 88.95(11)  | O9-Zn2-O4 <sup>D</sup>                 | 90.70(13)  | O15-Zn2-O4 <sup>D</sup>               | 92.78(13)  |
| O11-Zn2-O16                            | 95.77(12)  | O9-Zn2-O16                             | 85.20(12)  | O15-Zn2-O16                           | 86.53(13)  |
| O4 <sup>D</sup> -Zn2-O16               | 175.28(12) | O11-Zn2-N6                             | 75.51(11)  | O9-Zn2-N6                             | 75.46(12)  |
| O15-Zn2-N6                             | 173.37(12) | O4 <sup>D</sup> -Zn2-N6                | 86.99(11)  | O16-Zn2-N6                            | 94.24(12)  |
| O13 <sup>C</sup> -Zn3-O13              | 140.52(12) | O13 <sup>C</sup> -Zn3-O14 <sup>C</sup> | 94.84(19)  | O13-Zn3-O14 <sup>C</sup>              | 85.53(18)  |
| O13 <sup>C</sup> -Zn3-O10              | 96.1(2)    | O13-Zn3-O10                            | 123.3(2)   | O14 <sup>C</sup> -Zn3-O10             | 95.17(18)  |
| O13 <sup>C</sup> -Zn3-O14              | 78.72(16)  | O13-Zn3-O14                            | 80.82(15)  | O14 <sup>C</sup> -Zn3-O14             | 148.66(8)  |
| O10-Zn3-O14                            | 115.91(15) | O12-Na1-O8                             | 80.81(12)  | O12-Na1-O5 <sup>E</sup>               | 80.53(12)  |
| O8-Na1-O5 <sup>E</sup>                 | 161.34(14) | O12-Na1-O11 <sup>F</sup>               | 95.84(12)  | O8-Na1-O11 <sup>F</sup>               | 86.63(11)  |
| O5 <sup>E</sup> -Na1-O11 <sup>F</sup>  | 95.34(11)  | O12-Na1-O16 <sup>G</sup>               | 165.72(13) | O8-Na1-O16 <sup>G</sup>               | 109.47(12) |
| O5 <sup>E</sup> -Na1-O16 <sup>G</sup>  | 88.90(11)  | O11 <sup>F</sup> -Na1-O16 <sup>G</sup> | 94.67(11)  |                                       |            |

\* Symmetry codes: for **1**: A = -x, -y+1, -z; B = -x, -y+1, -z+1; C = x, y, z-1; D = -x+1, -y+1, -z+1; for **2**: A = x+1/2, -y+1/2, -z+1; B = x-1/2, -y+1/2, -z+1; C = -x+2, -y+1, -z-1; D = -x+3/2, y+1/2, z; E = -x+1/2, y+1/2, z; F = x-1/2, y, -z+3/2; G = x-1, y, z.
